# Supplementary material for: Mesoporous VO2 nanowires with excellent cycling stability and enhanced rate capability for lithium batteries
Source: Royal Society of Chemistry journal article supplement (doi:10.1039/c4ra06304j), 2014-01-01
Supplement: c4ra06304j1.pdf [file c4ra06304j1.pdf]

### Supporting Information

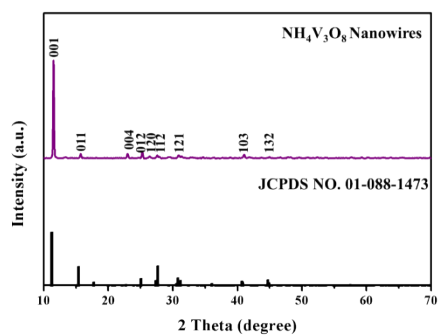

Figure S1. XRD pattern of  $\text{NH}_4\text{V}_3\text{O}_8$  nanowires.

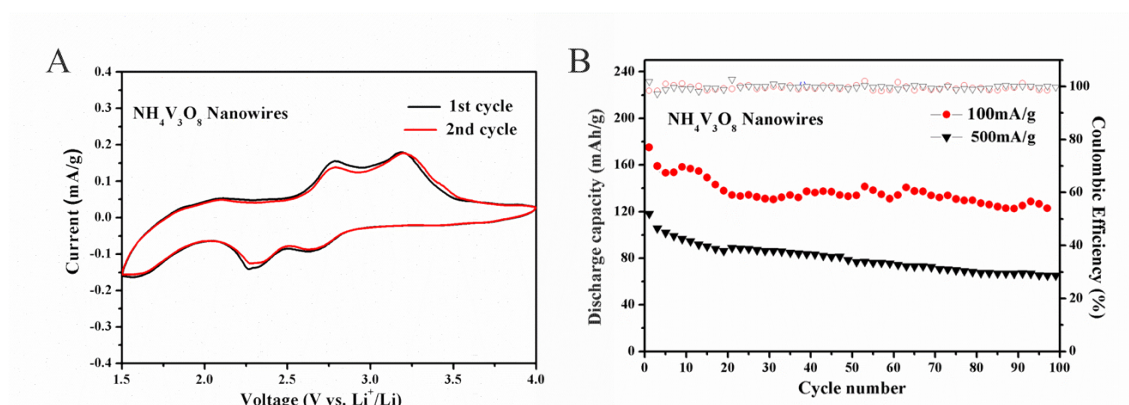

Figure S2. CV curves (a) and cycle performance (b) of  $\text{NH}_4\text{VO}_8$  nanowires.

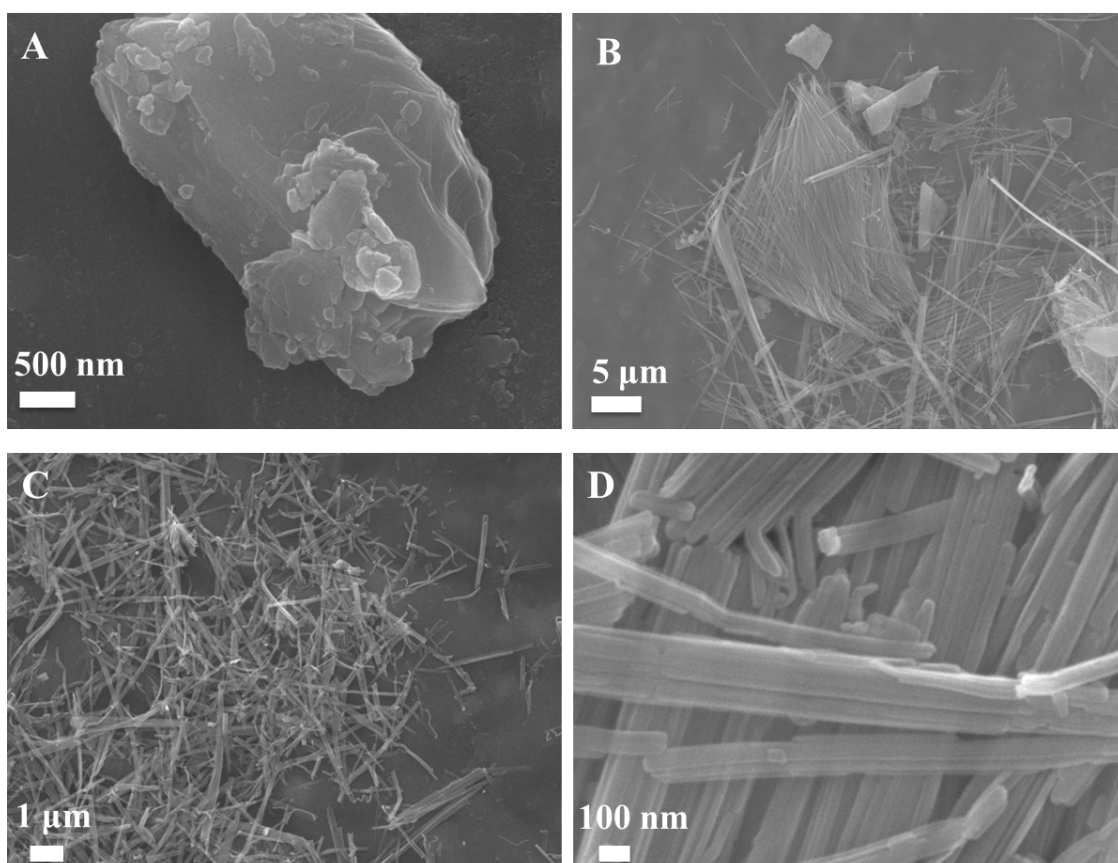

Figure S3. SEM images of  $\text{NH}_4\text{V}_3\text{O}_8$  obtained in different condition: hydrothermal time is 3 days (A); 5 days (B); 7 days (C, D).

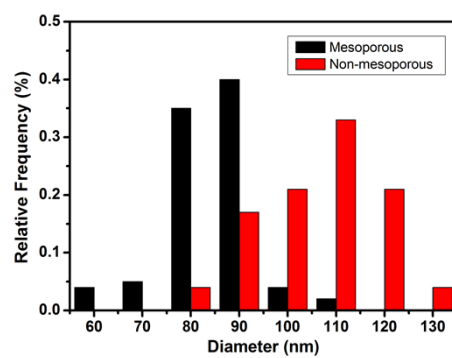

Figure S4. Statistical analysis of diameters of  $\text{NH}_4\text{V}_3\text{O}_8$  nanowires (black) and mesoporous  $\text{VO}_2$  nanowires (red).

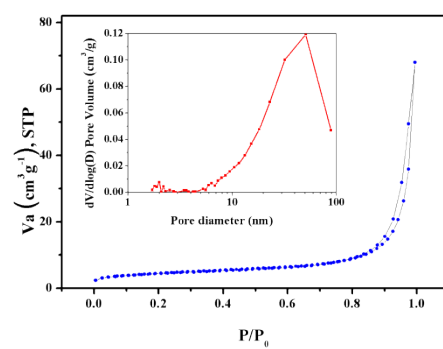

Figure S5. Desorption isotherms and pore size distribution (inset) of  $\text{NH}_4\text{V}_3\text{O}_8$  nanowires.

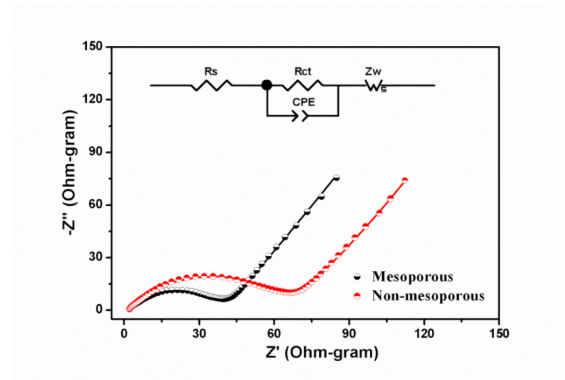

Figure S6. Variations and fittings between  $Z_{re}$  and the reciprocal square root of the angular frequency in the low frequency region of mesoporous (black) and non-mesoporous (red)  $VO_2$  nanowires.

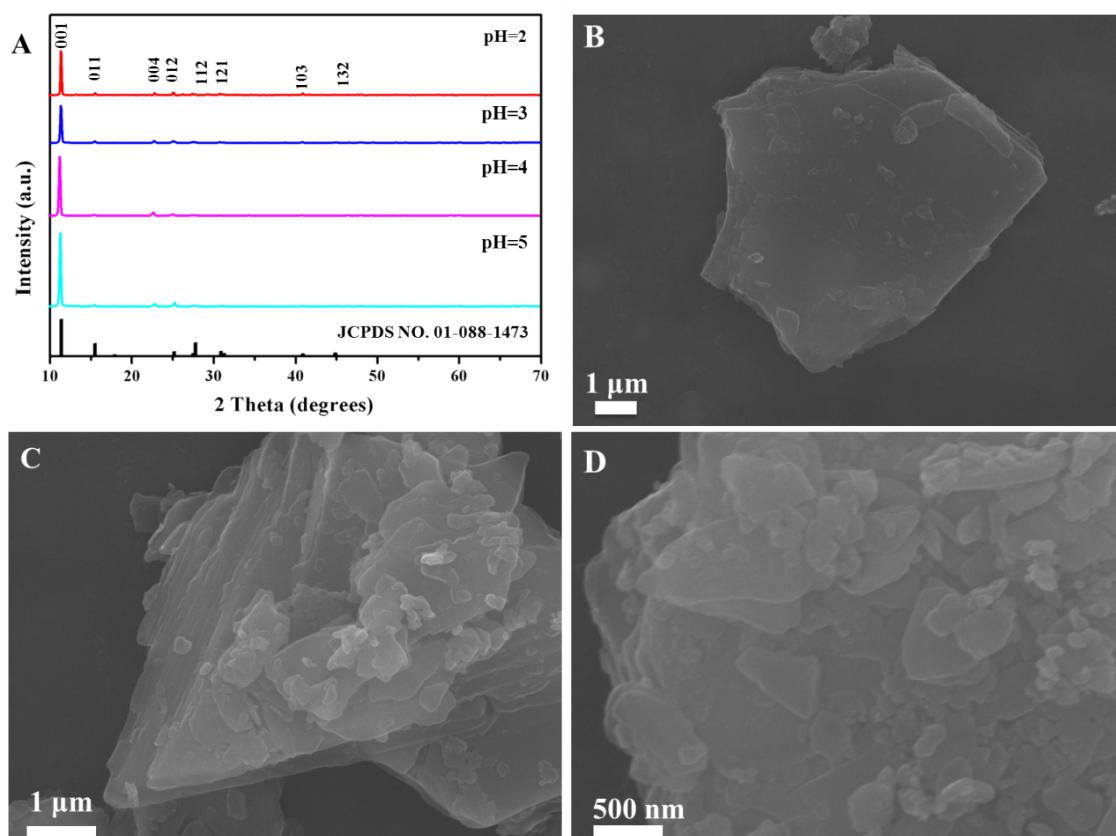

Figure S7. XRD pattern of obtained  $\text{NH}_4\text{V}_3\text{O}_8$  in different condition: pH=2(red) pH=3 (blue); pH=4 (purple); pH=5 (light blue). SEM images of  $\text{NH}_4\text{V}_3\text{O}_8$  obtained in different condition: pH=3 (B); pH=4 (C); pH=5 (D).

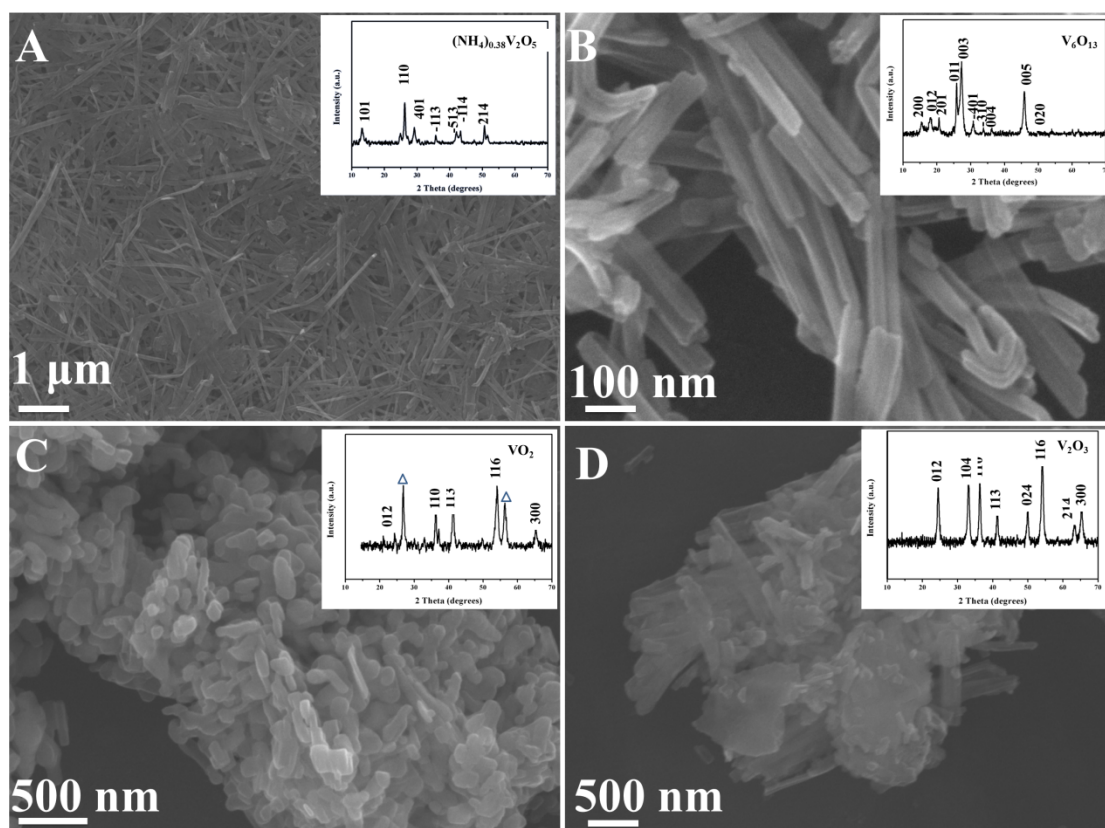

Figure S8. SEM images (inset is the corresponding XRD pattern) of obtained products in different annealing condition: 300°C (A); 350°C (B); 450°C (C); 500°C (D).

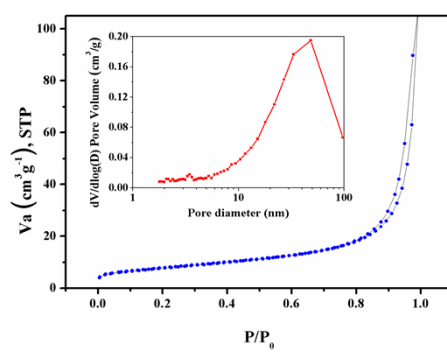

Figure S9. Desorption isotherms and pore size distribution (inset) of  $(\text{NH}_4)_{0.38}\text{V}_2\text{O}_5$  nanowires obtained at the annealing temperature of 350°C.

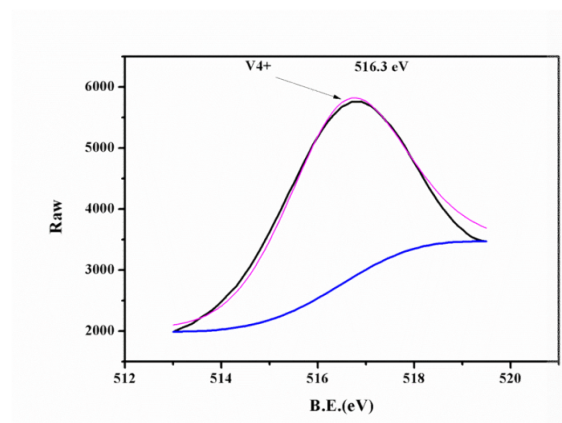

Figure S10. XPS spectrum of mesoporous VO<sub>2</sub> nanowires.
